# Supplementary material for: Probing solvent–solvent and solute–solvent interactions in surfactant binary mixtures: solvatochromic parameters, preferential solvation, and quantum theory of atoms in molecules analysis
Source: Royal Society of Chemistry journal article supplement (doi:10.1039/c5ra23942g), 2016-01-01
Supplement: c5ra23942g1.pdf [file c5ra23942g1.pdf]

**Electronic Supplementary Information (ESI)**

**Probing Solvent-Solvent and Solute-Solvent Interactions in  
Surfactant Binary Mixtures: Solvatochromic Parameters,  
Preferential Solvation, and Quantum Theory of Atoms in Molecules  
Analysis**

*Mona Kohantorabi, Mostafa Fakhraee, Hadi Salari, Mohammad Reza Gholami\**

Department of Chemistry, Sharif University of Technology,  
Tehran, 11365-11155, Iran

(\*Corresponding author e-mail: [gholami@sharif.edu](mailto:gholami@sharif.edu))

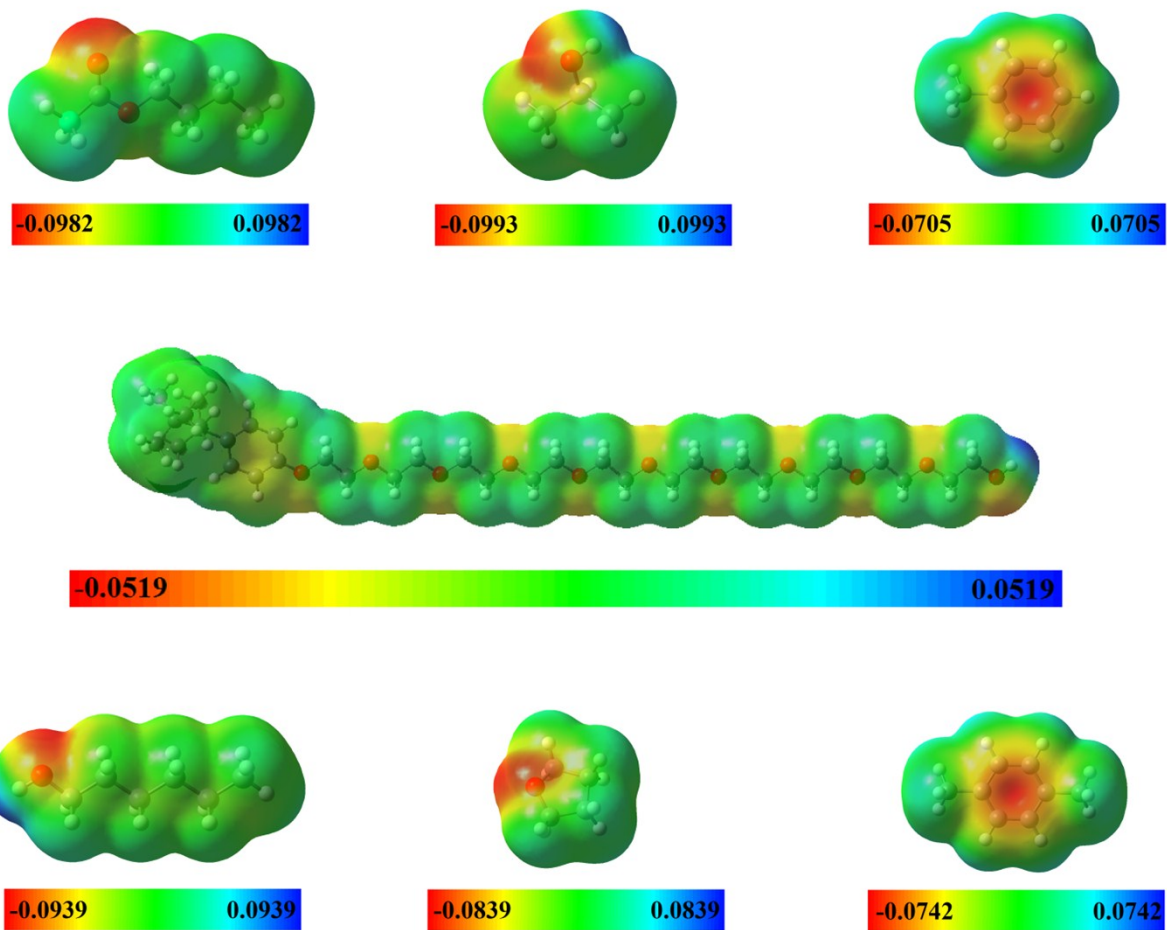

**Figure S1.** Electrostatic potential map (ESP) of Butyl acetate, 2-Propanol, Hexanol, THF, p-Xylene, Toluene, and TX-100 accompanied with their charge variation.

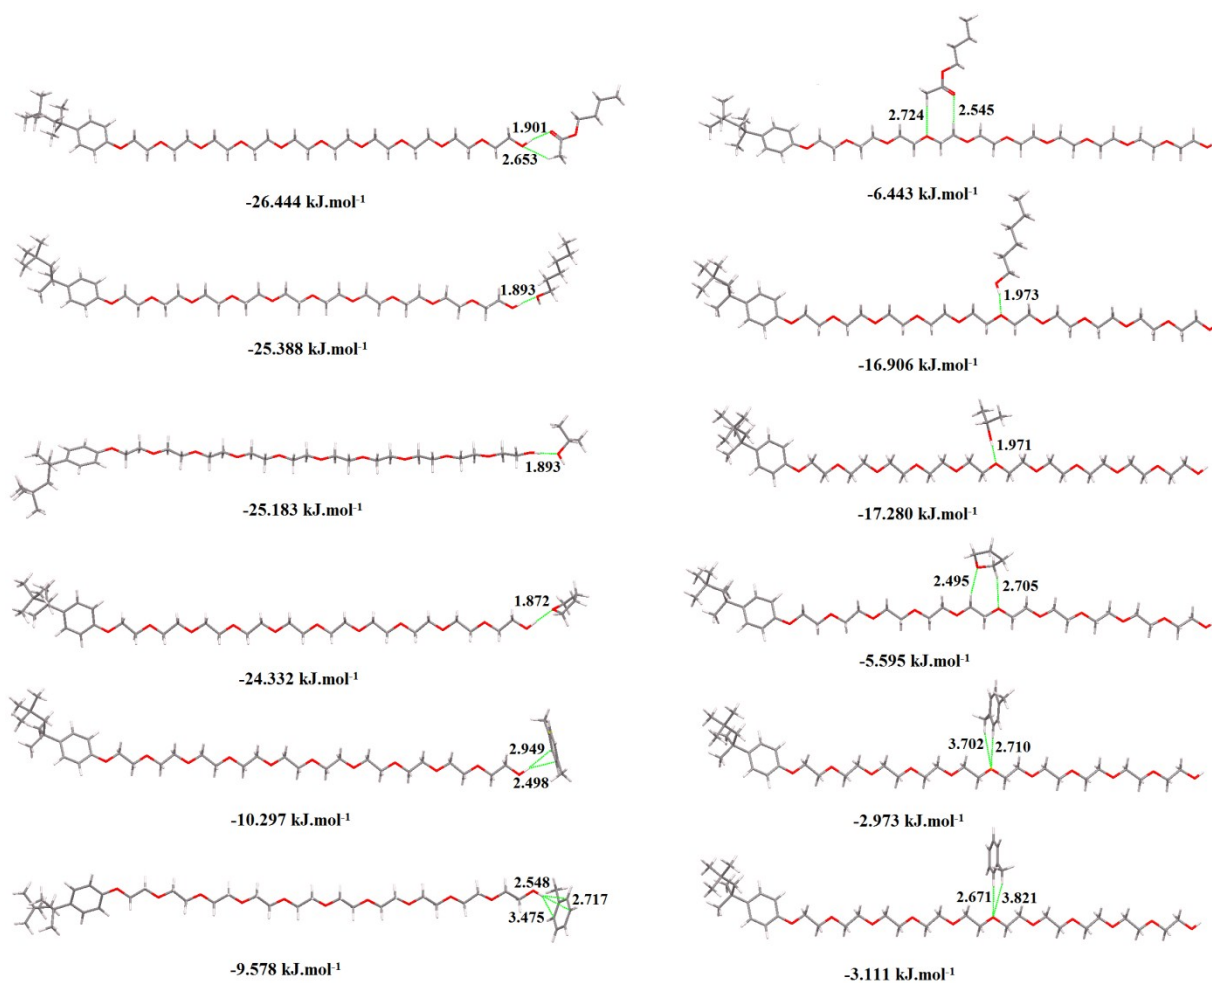

**Figure S2.** The optimized geometries of Butyl acetate/TX-100, Hexanol/TX-100, 2-Propanol/TX-100, THF/TX-100, p-Xylene/TX-100, and Toluene/TX-100 in binary mixtures accompanied with their interaction energies. The strong interactions are shown by dot line and distances are in Å.

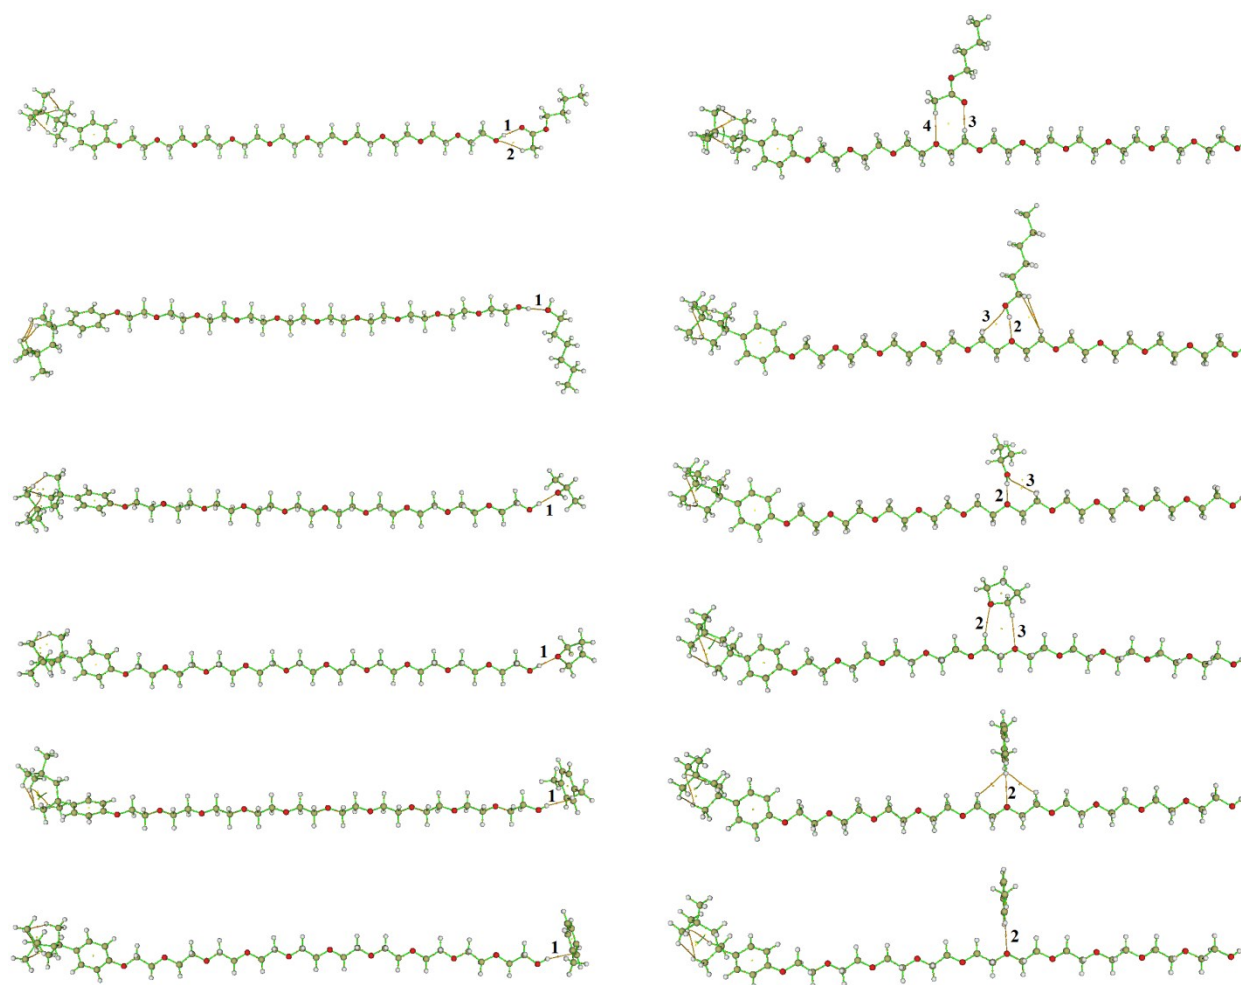

**Figure S3.** BCPs (in orange color), CCPs (in yellow color), and RCPs (in yellow color) of optimized structures for Butyl acetate/TX-100, Hexanol/TX-100, 2-Propanol/TX-100, THF/TX-100, p-Xylene/TX-100, and Toluene/TX-100 binary mixtures, performing at the B3LYP/6-311++G(d,p) level.

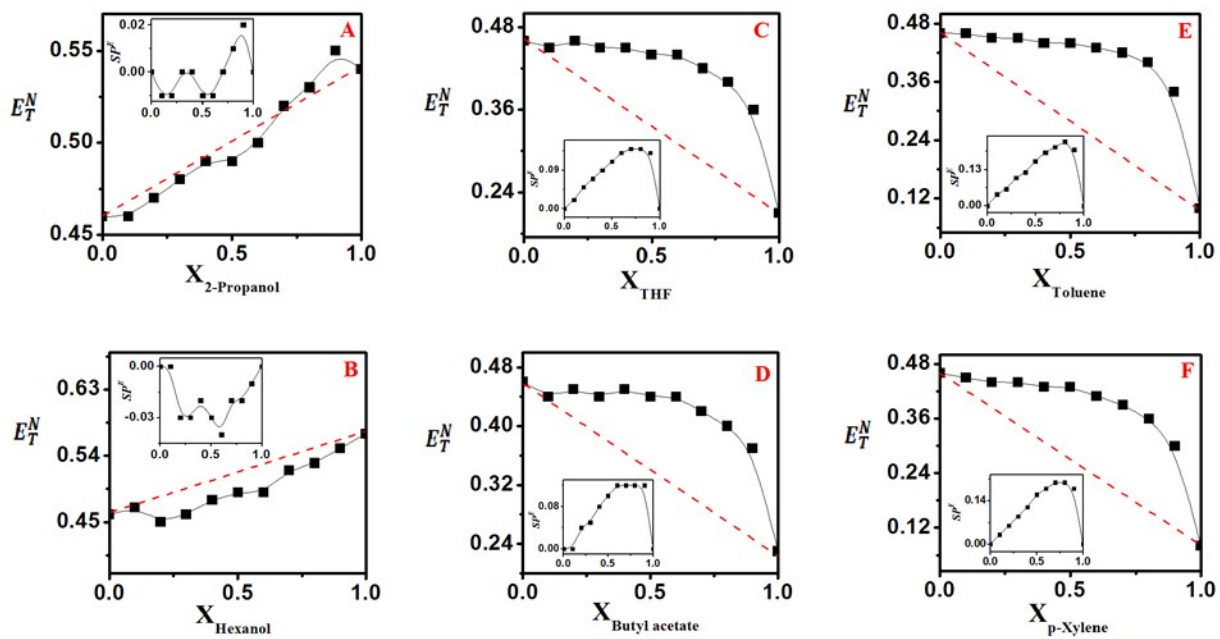

**Figure S4.** Variation in  $E_T^N$  and excess solvatochromic parameters ( $SP^E$ ) with  $X_{\text{Solvent}}$  in molecular solvents/TX-100 binary mixtures at ambient condition.

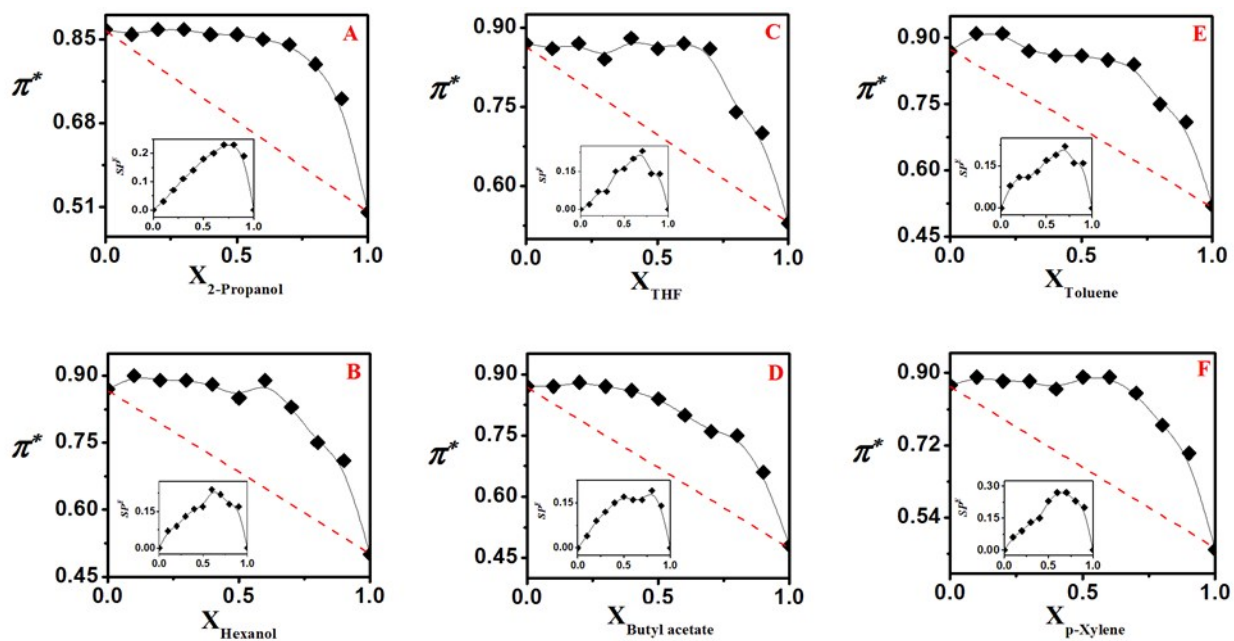

**Figure S5.** Variation in  $\pi^*$  and excess solvatochromic parameters ( $SP^E$ ) with  $X_{\text{Solvent}}$  in molecular solvents/TX-100 binary mixtures at ambient condition.

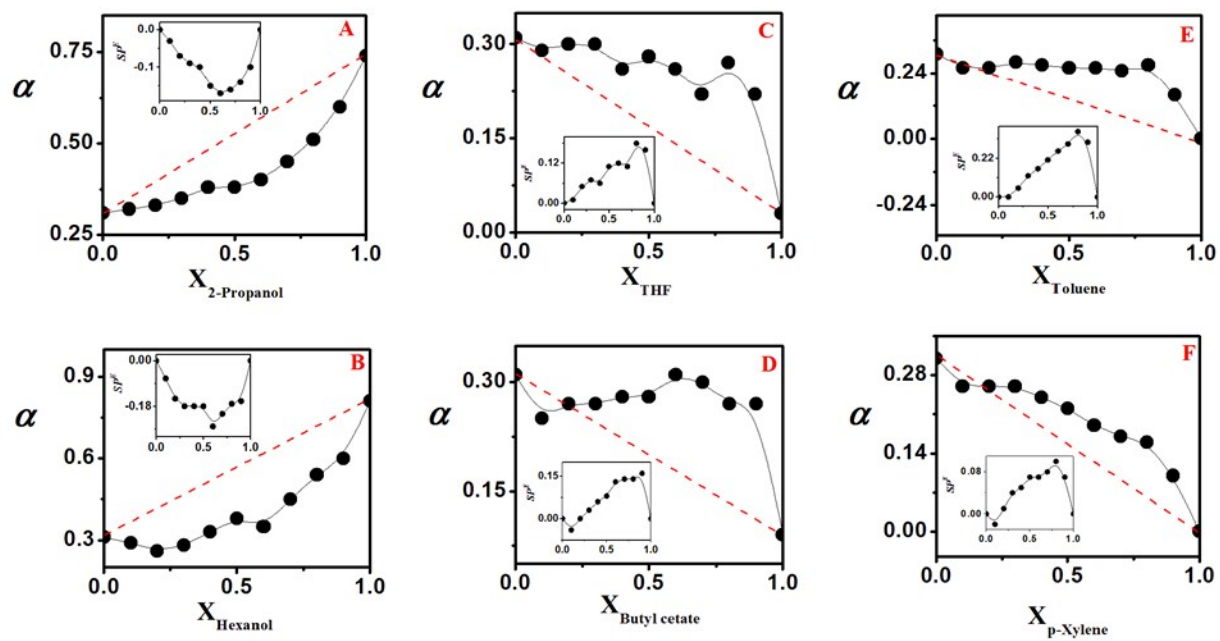

**Figure S6.** Variation in  $\alpha$  and excess solvatochromic parameters ( $SP^E$ ) with  $X_{\text{Solvent}}$  in molecular solvents/TX-100 binary mixtures at ambient condition.

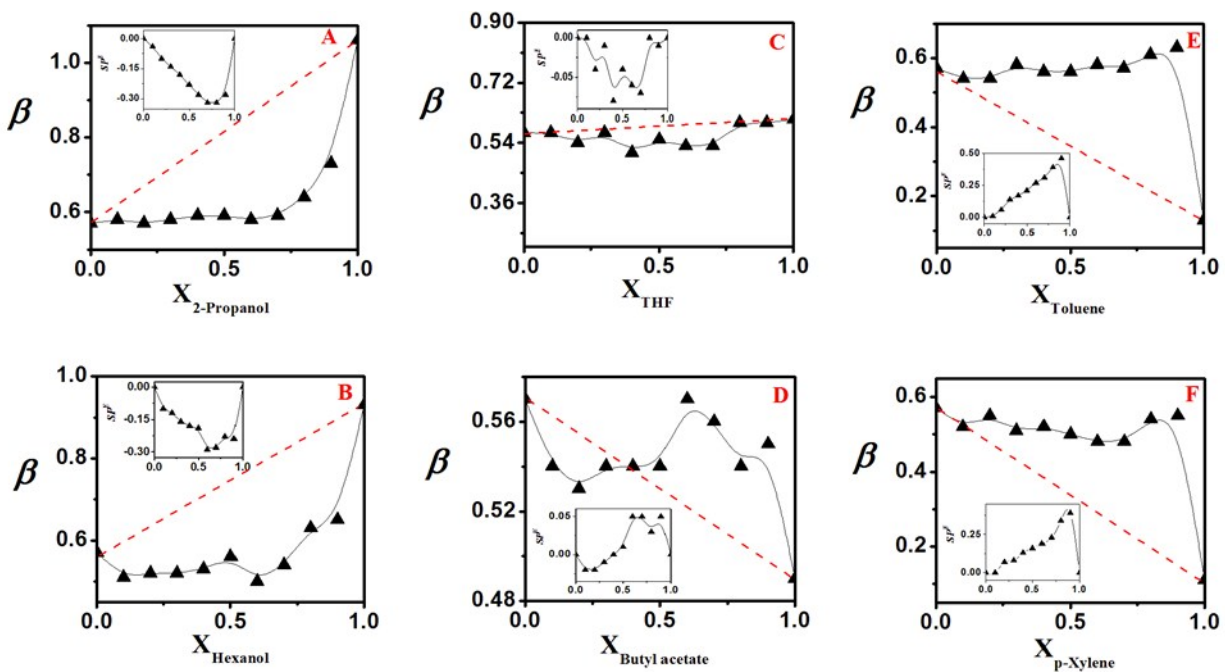

**Figure S7.** Variation in  $\beta$  and excess solvatochromic parameters ( $S^{PE}$ ) with  $X_{\text{Solvent}}$  in molecular solvents/TX-100 binary mixtures at ambient condition.
